# Supplementary material for: Trap engineering using oxygen-doped graphitic carbon nitride for high-performance perovskite solar cells
Source: Royal Society of Chemistry journal article supplement (doi:10.1039/d3tc01711g), 2023-01-01
Supplement: d3tc01711g1.pdf [file d3tc01711g1.pdf]

Supporting Information for

## Trap engineering using oxygen-doped graphitic carbon nitride for high-performance perovskite solar cells

Yaling Lei,<sup>a</sup> Xiaoyan Li,<sup>a</sup> Jingying Liang,<sup>a</sup> Junzhe Shi,<sup>a</sup> Yunhao Wei,<sup>a</sup> Pingli Qin,<sup>\*b</sup> Hong Tao,<sup>c</sup> Jianjun Chen,<sup>a</sup> Zuojun Tan<sup>\*a</sup> and Hongwei Lei<sup>\*a</sup>

<sup>a</sup> College of Science, Huazhong Agricultural University, Wuhan, 430070, China

<sup>b</sup> Hubei Key Laboratory of Optical Information and Pattern Recognition, School of Optical Information and Energy Engineering, Wuhan Institute of Technology, Wuhan, 430205, China

<sup>c</sup> Hubei Key Laboratory of Plasma Chemistry and Advanced Materials, School of Materials Science and Engineering, Wuhan Institute of Technology, Wuhan 430205, China

Email: leihw@mail.hzau.edu.cn; tzj@mail.hzau.edu.cn; qpl2015@wit.edu.cn

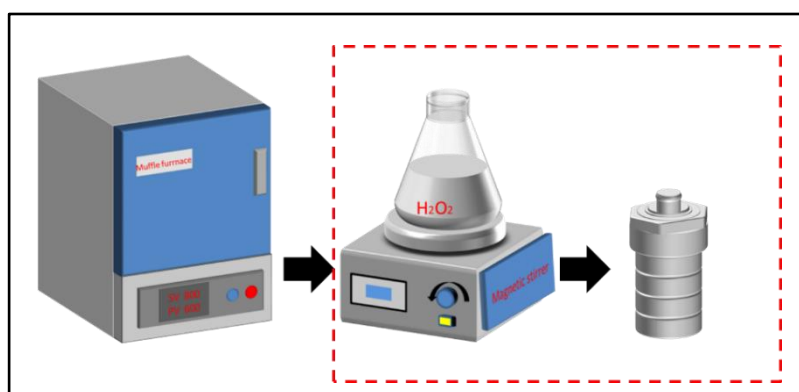

**Fig. S1** The preparation process of g-C<sub>3</sub>N<sub>4</sub> and g-C<sub>3</sub>N<sub>4</sub>-O.

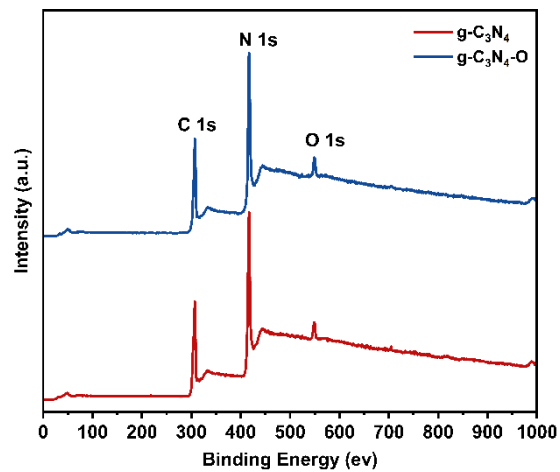

**Fig. S2** The whole survey scan XPS spectra of g-C<sub>3</sub>N<sub>4</sub> and g-C<sub>3</sub>N<sub>4</sub>-O.

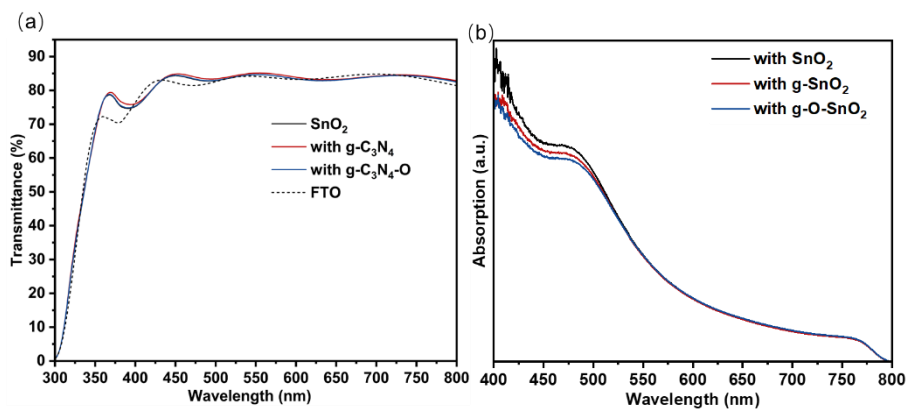

**Fig. S3** (a) UV-vis transmittance spectra of different ETLs; (b) UV-vis absorption spectra of perovskite film deposited on different ETLs.

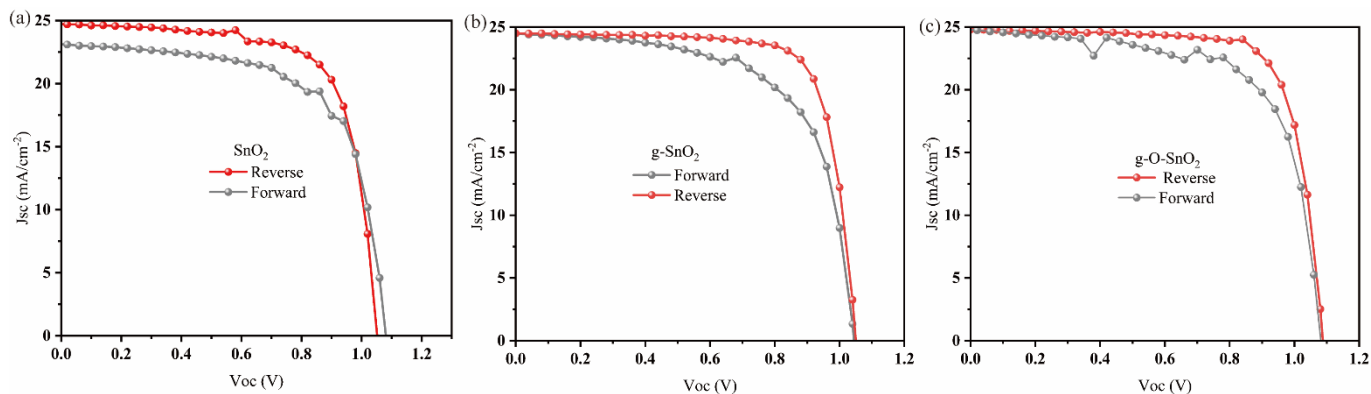

**Fig. S4**  $J$ - $V$  curves of MA<sub>0.7</sub>FA<sub>0.3</sub>PbI<sub>3</sub> perovskite solar cells with different ETLs (SnO<sub>2</sub> (a), g-SnO<sub>2</sub> (b) and g-O-SnO<sub>2</sub> (c)) under reverse and forward scans.

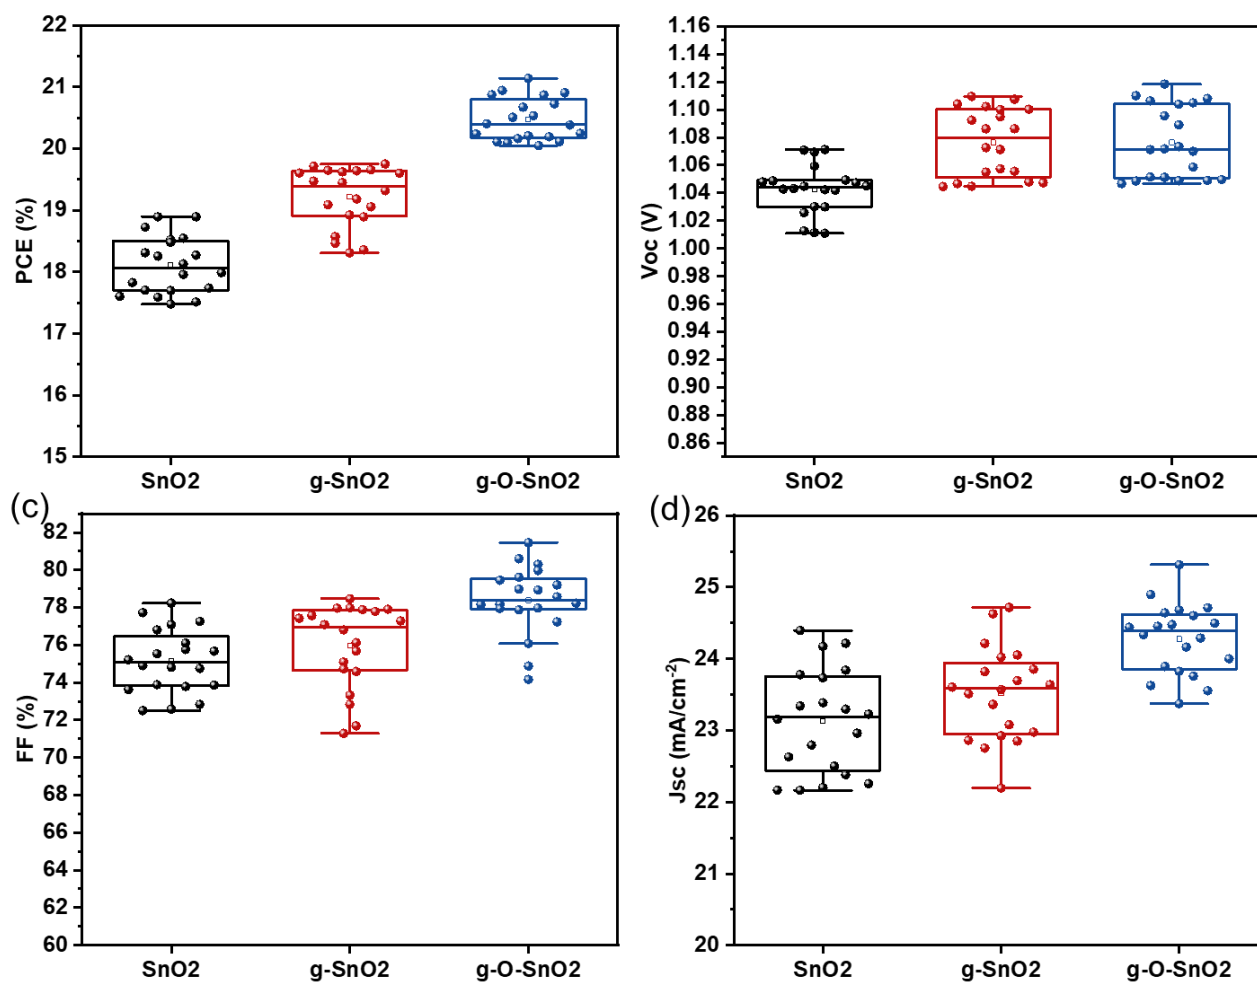

**Fig. S5** Statistic of the PCE (a),  $J_{sc}$  (b),  $V_{oc}$  (c) and FF (d) values of PVSCs with different ETLs (SnO<sub>2</sub>, g-SnO<sub>2</sub> and g-O-SnO<sub>2</sub>).

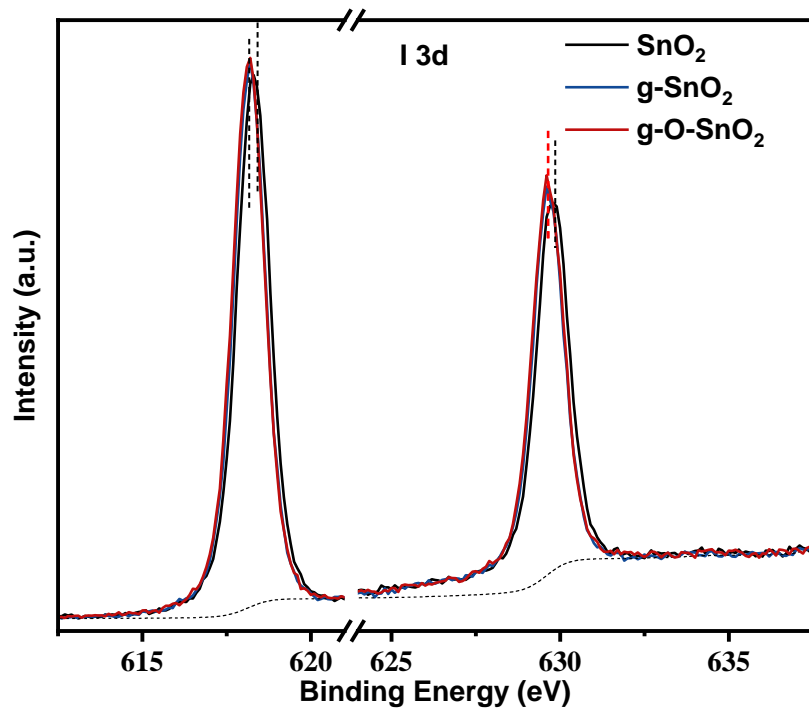

Fig. S6 I 3d XPS spectra for perovskite films deposited on different ETLs.

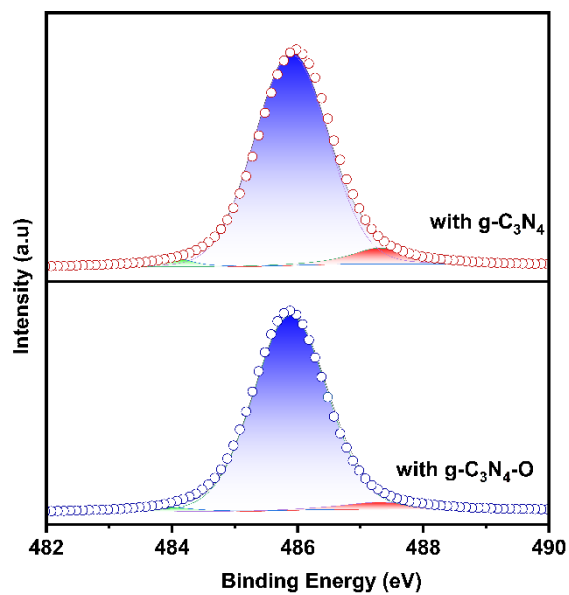

Fig. S7 XPS spectra of Sn atoms in different SnO<sub>2</sub>.

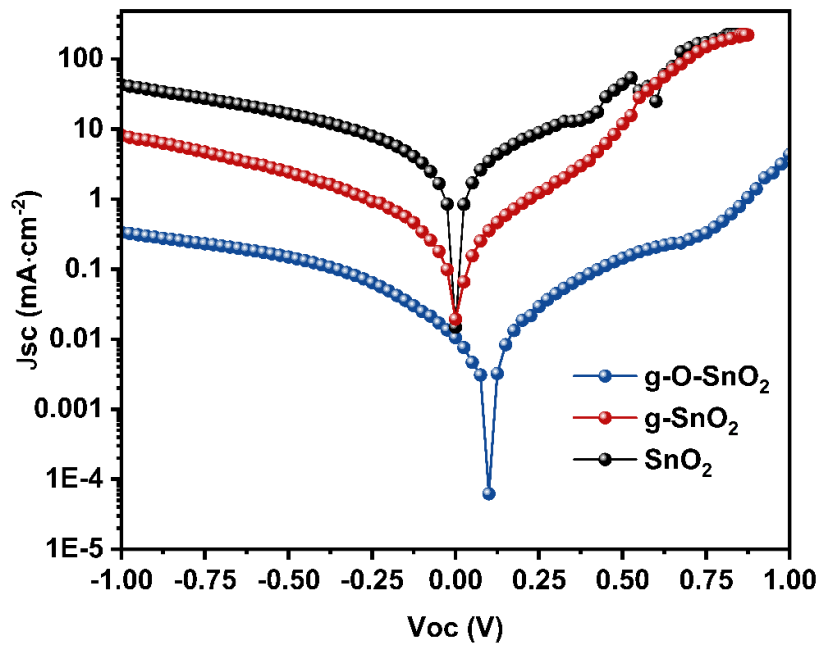

Fig. S8 The J-V under dark condition on a semi-log plot with different ETLs.

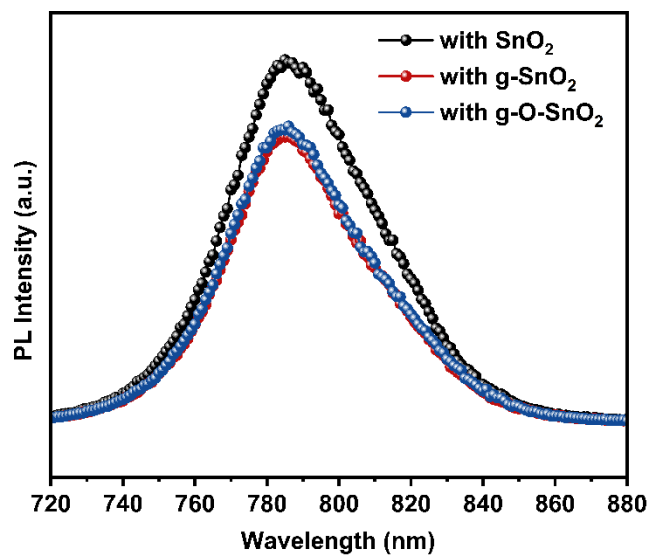

Fig. S9 Steady-state photoluminescence (PL) of perovskite films on different ETLs.

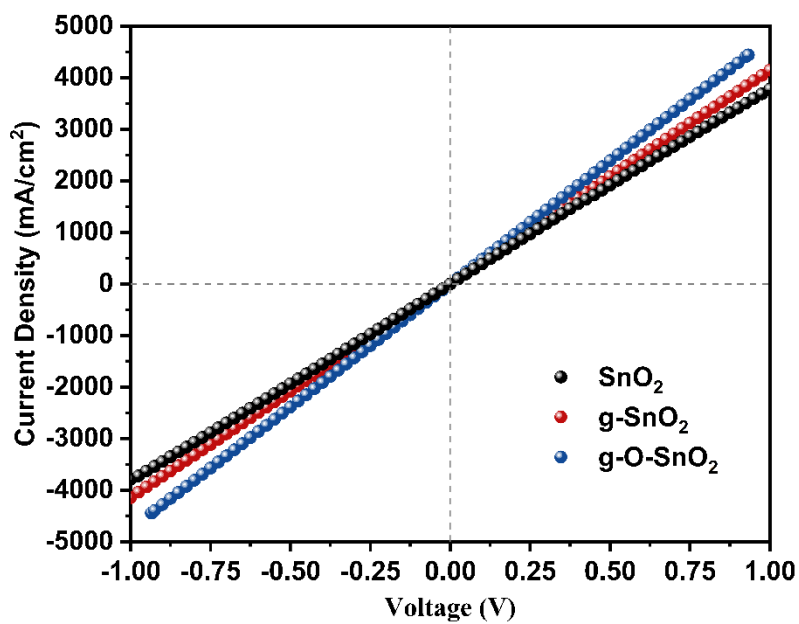

**Fig. S10** I-V characteristics of SnO<sub>2</sub>, g-SnO<sub>2</sub> and g-O-SnO<sub>2</sub> thin films

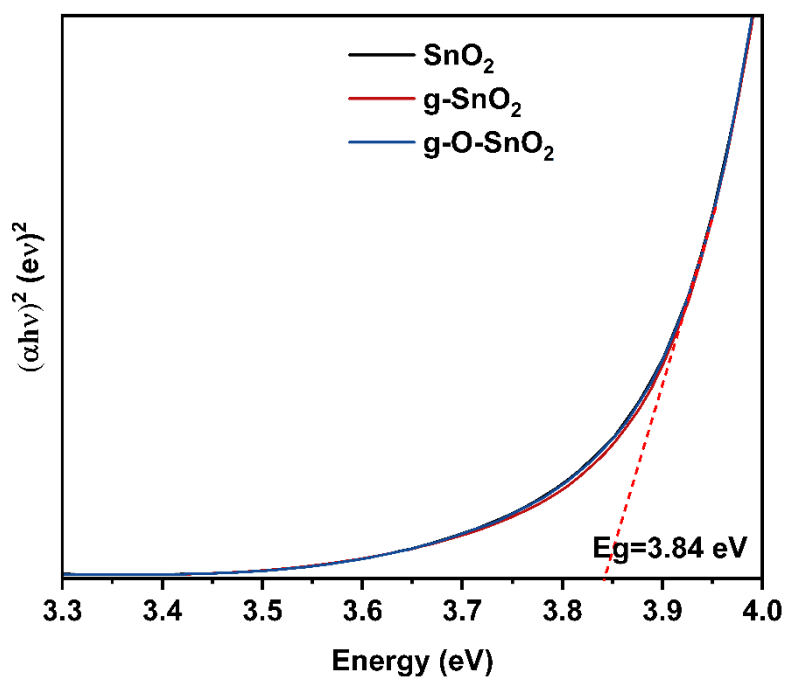

**Fig. S11** The bandgap diagrams of different electron transport layers (SnO<sub>2</sub>, g-SnO<sub>2</sub> and g-O-SnO<sub>2</sub>).

**Table S1.** Summary of the photovoltaic performance of devices based on different ETLs.

| Sample               | J <sub>SC</sub> (mA/cm <sup>2</sup> ) | V <sub>OC</sub> (V) | Fill Factor (%) | PCE (%) |
|----------------------|---------------------------------------|---------------------|-----------------|---------|
| SnO <sub>2</sub>     | 23.22                                 | 1.05                | 77.71           | 18.95   |
| g-SnO <sub>2</sub>   | 23.08                                 | 1.10                | 77.79           | 19.75   |
| g-O-SnO <sub>2</sub> | 24.44                                 | 1.11                | 77.94           | 21.14   |

**Table S2.** Statistics on the photoelectric conversion efficiency of binary perovskite solar cells.

| Year | Perovskite(additive)                                                                                                 | Device Configuration                                                                                                   | $V_{OC}$ (V) | $J_{SC}$ (mA cm <sup>-2</sup> ) | FF (%)     | PCE (%)    | Ref  |
|------|----------------------------------------------------------------------------------------------------------------------|------------------------------------------------------------------------------------------------------------------------|--------------|---------------------------------|------------|------------|------|
| 2017 | (FAPbI <sub>3</sub> ) <sub>0.85</sub> (MAPbBr <sub>3</sub> ) <sub>0.15</sub>                                         | FTO/TiO <sub>2</sub> /TiO <sub>2</sub> / perovskite/ Spiro-OMeTAD/ Au                                                  | 1.16         | 23.18                           | 78         | 21.3       | [1]  |
| 2017 | (FA <sub>0.85</sub> MA <sub>0.15</sub> ) <sub>1-x</sub> Pb(I <sub>0.85</sub> Br <sub>0.15</sub> ) <sub>3</sub> (KI)  | FTO/TiO <sub>2</sub> :LiMg/TiO <sub>2</sub> :Li/ perovskite/Spiro-OMeTAD/ Au                                           | 1.167        | 22.99                           | 76         | 20.32      | [2]  |
| 2017 | (FAPbI <sub>3</sub> ) <sub>0.85</sub> (MAPbBr <sub>3</sub> ) <sub>0.15</sub>                                         | FTO/c-SnO <sub>2</sub> /(FAPbI <sub>3</sub> ) <sub>0.85</sub> (MAPbBr <sub>3</sub> ) <sub>0.15</sub> /spiro-OMeTAD /Au | 1.05         | 22.8                            | 66.2       | 15.8       | [3]  |
| 2017 | (FA <sub>0.85</sub> MA <sub>0.15</sub> ) <sub>0.95</sub> Pb(I <sub>0.85</sub> Br <sub>0.15</sub> ) <sub>3</sub> (KI) | FTO/SnO <sub>2</sub> (sol-gel)/ perovskite/Spiro-OMeTAD/ Au                                                            | 1.132        | 22.95                           | 79         | 20.56      | [4]  |
| 2018 | FA <sub>0.85</sub> MA <sub>0.15</sub> PbBr <sub>0.45</sub> I <sub>2.55</sub> (KI)                                    | FTO/TiO <sub>2</sub> :LiMg/TiO <sub>2</sub> :Li/perovskite/Spiro-OMeTAD/Au                                             | 1.154        | 22.92                           | 77.7       | 20.55      | [5]  |
| 2018 | MAFAPbI <sub>3-x</sub> Cl <sub>x</sub>                                                                               | FTO/TiO <sub>2</sub> /perovskite Spiro-OMeTAD/Au                                                                       | 1.04         | 22.7                            | 75         | 17.7       | [6]  |
| 2018 | (FAPbI <sub>3</sub> ) <sub>0.85</sub> (MAPbBr <sub>3</sub> ) <sub>0.15</sub>                                         | (FTO)/TiO <sub>2</sub> /perovskite/ Spiro-OMeTAD/Au                                                                    | 1.07         | 23.76                           | 80         | 20.31      | [7]  |
| 2019 | FA <sub>0.93</sub> MA <sub>0.07</sub> PbI <sub>3</sub>                                                               | ITO/SnO <sub>2</sub> /Perovskite/ PEAI/Spiro/Au                                                                        | 1.18         | 25.2                            | 78.4       | 23.32      | [8]  |
| 2019 | MA <sub>x</sub> FA <sub>1-x</sub> PbI <sub>3-y</sub> Br <sub>y</sub>                                                 | ITO/c-SnO <sub>2</sub> /MA <sub>x</sub> FA <sub>1-x</sub> PbI <sub>3-y</sub> Br <sub>y</sub> + MWCNTc /C               | 1.04         | 23.5                            | 66.5       | 16.3       | [9]  |
| 2019 | FA <sub>0.83</sub> MA <sub>0.17</sub> Pb(I <sub>0.83</sub> Br <sub>0.17</sub> ) <sub>3</sub> (KI)                    | FTO/TiO <sub>x</sub> /perovskite/ Spiro-OMeTAD/Ag                                                                      | 1.15         | 23.5                            | 75         | 20.4       | [10] |
| 2019 | MA:FA:Pb:I:Cl=1:1:1:3:1                                                                                              | FTO/SnO <sub>2</sub> /perovskite/ Spiro-OMeTAD /Ag                                                                     | 1.06         | 23.75                           | 81         | 20.39      | [11] |
| 2020 | MAFAPbI <sub>3</sub> Cl <sub>3-x</sub>                                                                               | ITO/SnO <sub>2</sub> :GQDs/MAFAPbI <sub>3</sub> Cl <sub>3-x</sub> /spiro-OMeTAD/Ag                                     | 1.11         | 24.4                            | 0.78       | 21.1       | [12] |
| 2020 | MAFAPbI <sub>3</sub> (TD-N T)                                                                                        | FTO/TiO <sub>2</sub> /perovskite/Spiro-OMeTAD/Au                                                                       | 1.14         | 23.85                           | 68.32      | 19.14      | [13] |
| 2021 | (FAPbI <sub>3</sub> ) <sub>0.93</sub> MAPbBr <sub>3</sub> ) <sub>0.07</sub>                                          | FTO/TiO <sub>2</sub> /perovskite/spiro-MeOTAD/Au                                                                       | 1.017        | 22.196                          | 72.17<br>6 | 16.30<br>1 | [14] |
| 2021 | FAPbI(47% MAI)                                                                                                       | ITO/MeO-2PACz perovskite/C <sub>60</sub> /BCP/Cu                                                                       | 1.05         | 25.70                           | 75.91      | 20.4       | [15] |
| 2021 | (FAPbI <sub>3</sub> ) <sub>0.95</sub> (MAPbBr <sub>3</sub> ) <sub>0.05</sub> (5%HAACL)                               | (FTO)/NiO/perovskite/Spiro-OMeTAD/Au                                                                                   | 1.11         | 24.75                           | 81.03      | 22.32      | [16] |
| 2022 | (MA <sub>0.5</sub> FA <sub>0.5</sub> )PbI <sub>3</sub> (TAA)                                                         | FTO/c-TiO <sub>2</sub> /mp-TiO <sub>2</sub> /perovskite/spiro-MeOTAD/Au                                                | 1.109        | 24.62                           | 78         | 21.29      | [17] |
| 2022 | MAFAPbI <sub>3-x</sub> Cl <sub>x</sub>                                                                               | ITO/SnO <sub>2</sub> /                                                                                                 | 1.05         | 20.94                           | 74.08      | 16.26      | [18] |

| Year | Perovskite(additive)                                 | Device Configuration                                                                              | $V_{OC}$ (V) | $J_{SC}$ (mA cm <sup>-2</sup> ) | FF (%) | PCE (%) | Ref      |
|------|------------------------------------------------------|---------------------------------------------------------------------------------------------------|--------------|---------------------------------|--------|---------|----------|
| 2022 | MAxFA1-xPbI <sub>3</sub>                             | perovskite/P3HT/Au<br>FTO/TiO <sub>2</sub> /ZnO/perovskite/<br>Spiro-OMeTAD /MoO <sub>3</sub> /Ag | 0.99         | 21.2                            | 0.67   | 14.1    | [19]     |
| 2022 | MA <sub>0.7</sub> FA <sub>0.3</sub> PbI <sub>3</sub> | FTO/SnO <sub>2</sub> /perovskite/<br>Spiro-OMeTAD/Ag                                              | 1.11         | 24.44                           | 77.94  | 21.14   | our work |

**Table S3.** The specific numerical value of the Sn atom in SnO<sub>2</sub> XPS spectrum.

|                      |                  | Position | Area   | Ration   | Sn <sup>4+</sup> /sn <sup>2+</sup> |
|----------------------|------------------|----------|--------|----------|------------------------------------|
| G-SnO <sub>2</sub>   | Sn               | 484.08   | 14264  | 0.022088 | 13.69                              |
|                      | Sn <sup>4+</sup> | 485.88   | 588515 | 0.911334 |                                    |
|                      | Sn <sup>2+</sup> | 487.28   | 42994  | 0.066578 |                                    |
| G-O-SnO <sub>2</sub> | Sn               | 483.88   | 16452  | 0.022681 | 22.79                              |
|                      | Sn <sup>4+</sup> | 485.88   | 679125 | 0.936237 |                                    |
|                      | Sn <sup>2+</sup> | 487.28   | 29799  | 0.041082 |                                    |

**Table S4.** TRPL decay-time fitting for perovskite films deposited on different electron transport layers.

| Sample                   | $\tau_1$ (ns) | A1 (%) | $\tau_2$ (ns) | A2 (%) | $\tau_{average}$ (ns) |
|--------------------------|---------------|--------|---------------|--------|-----------------------|
| PVK+SnO <sub>2</sub>     | 46.8165       | 42.90  | 194.3809      | 57.10  | 171.77                |
| PVK+g-SnO <sub>2</sub>   | 42.5370       | 52.34  | 96.3990       | 47.66  | 78.82                 |
| PVK+g-O-SnO <sub>2</sub> | 35.3823       | 37.26  | 127.4703      | 62.74  | 114.44                |

**Table S5.** The energy data of SnO<sub>2</sub>, g-SnO<sub>2</sub> and g-O-SnO<sub>2</sub> from UPS measurements

| Sample               | $E_{cutoff}$ (eV) | $W_F$ (eV) | $E_F$ (eV) | $E_{VBM}$ (eV) | $E_{CBM}$ (eV) |
|----------------------|-------------------|------------|------------|----------------|----------------|
| SnO <sub>2</sub>     | 17.19             | 4.01       | -4.01      | -7.73          | -3.89          |
| g-SnO <sub>2</sub>   | 17.25             | 3.95       | -3.95      | -7.71          | -3.87          |
| g-O-SnO <sub>2</sub> | 17.51             | 3.69       | -3.69      | -7.49          | -3.65          |



Work function ( $W_F$ ) is evaluated by the formula:  $W_F = h\nu - E_{\text{cutoff}}$

Fermi level energy ( $E_F$ ) is evaluated by the formula:  $E_F = -W_F$

$h\nu$  is the photon energy of irradiation light. (21.2 eV)

Valence band energy level ( $E_{\text{VBM}}$ ) is evaluated by the formula:  $E_{\text{VBM}} = E_F - E_g$

## Reference:

- 1 K.T. Cho, S. Paek, G. Grancini, C. Roldán-Carmona, P. Gao, Y. Lee, M.K. Nazeeruddin, *Energy Environ. Sci.*, 2017, **10**, 621-627.
- 2 Z. Tang, T. Bessho, F. Awai, T. Kinoshita, M.M. Maitani, R. Jono, T.N. Murakami, H. Wang, T. Kubo, S. Uchida, *Sci. Rep.*, 2017, **7**, 1-7.
- 3 P. Pinpithak, H.-W. Chen, A. Kulkarni, Y. Sanehira, M. Ikegami, T. Miyasaka, *Chem. Lett.*, 2017, **46**, 382-384.
- 4 T. Bu, X. Liu, Y. Zhou, J. Yi, X. Huang, L. Luo, J. Xiao, Z. Ku, Y. Peng, F. Huang, *Energy Environ. Sci.*, 2017, **10**, 2509-2515.
- 5 Z. Tang, S. Uchida, T. Bessho, T. Kinoshita, H. Wang, F. Awai, R. Jono, M.M. Maitani, J. Nakazaki, T. Kubo, *Nano Energy*, 2018, **45**, 184-192.
- 6 M.M. Tavakoli, P. Yadav, D. Prochowicz, R. Tavakoli, M. Saliba, *J. Phys. D.*, 2018, **52**, 034005.
- 7 D. Liu, W. Zhou, H. Tang, P. Fu, Z. Ning, *Sci. China Chem.*, 2018, **61**, 1278-1284.
- 8 Q. Jiang, Y. Zhao, X. Zhang, X. Yang, Y. Chen, Z. Chu, Q. Ye, X. Li, Z. Yin, J. You, *Nat. Photonics*, 2019, **13**, 460-466.
- 9 J. Zhou, J. Wu, N. Li, X. Li, Y.-Z. Zheng, X. Tao, *J. Mater. Chem. A*, 2019, **7**, 17594-17603.
- 10 L. Kuai, Y. Wang, Z. Zhang, Y. Yang, Y. Qin, T. Wu, Y. Li, Y. Li, T. Song, X. Gao, *Sol. RRL*, 2019, **3**, 1900053.
- 11 T. Zhang, Q. Xu, F. Xu, Y. Fu, Y. Wang, Y. Yan, L. Zhang, Y. Zhao, *Sci. Bull.*, 2019, **64**, 1608-1616.
- 12 S. Pang, C. Zhang, H. Zhang, H. Dong, D. Chen, W. Zhu, H. Xi, J. Chang, Z. Lin, J. Zhang, *Appl. Surf. Sci.*, 2020, **507**, 145099.
- 13 A.M. Elseman, A.H. Zaki, A.E. Shalan, M.M. Rashad, Q.L. Song, *Ind. Eng. Chem. Res.*, 2020, **59**, 18549-18557.
- 14 S.H. Joo, H.W. Choi, *Coatings*, 2021, **11**, 1184.
- 15 M. Roß, S. Severin, M.B. Stutz, P. Wagner, H. Köbler, M. Favin-Lévêque, A. Al-Ashouri, P. Korb, P. Tockhorn, A. Abate, *Adv. Energy Mater.*, 2021, **11**, 2101460.
- 16 L. Wang, X. Wang, L. Zhu, S.-B. Leng, J. Liang, Y. Zheng, Z. Zhang, Z. Zhang, X.X. Liu, F. Liu, *Chem. Eng. J.*, 2022, **430**, 132730.
- 17 J.V. Patil, S.S. Mali, C.K. Hong, *Mater. Today Chem.*, 2022, **25**, 100950.
- 18 G. Wu, X. Dong, G. Cui, R. Sun, X. Wu, M. Gu, Z. Zuo, Y. Liu, *Sol. Energy*, 2022, **237**, 153-160.
- 19 Z. Irshad, M. Adnan, J.K. Lee, *J. Mater. Sci.*, 2022, **57**, 1936-1946.
